# Supplementary material for: Agonist-Evoked Increases in Intra-Platelet Zinc Couple to Functional Responses
Source: PubMed Central journal article supplement (PMC6327715; doi:10.1055/s-0038-1676589), 2018-12-31
Supplement: 10-1055-s-0038-1676589-s180454.pdf [file 10-1055-s-0038-1676589-s180454.pdf]

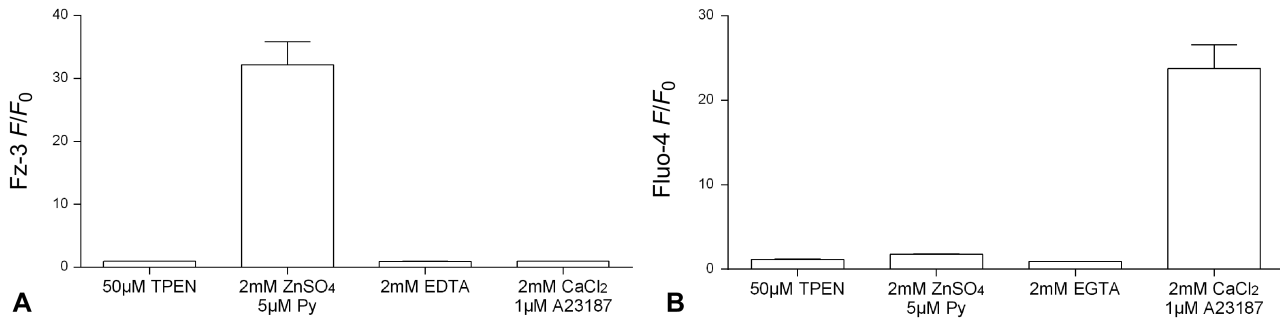

**Supplementary Fig. S1** Calibration of fluorophores. Washed Fz-3 (A) or Fluo-4 (B) loaded platelet suspensions were treated for 15 minutes with Zn<sup>2+</sup> or Ca<sup>2+</sup> ionophores in the presence of 2 mM CaCl<sub>2</sub> or ZnSO<sub>4</sub>, to determine R<sub>max</sub> values. Fz-3 R<sub>min</sub> was obtained from platelets pre-treated for 15 minutes with 50 μM TPEN, while R<sub>max</sub> was obtained following co-incubation with 5 μM pyrithione (Py) with 2 mM ZnSO<sub>4</sub> for 15 minutes. Fluo-4 R<sub>min</sub> was obtained from platelets pre-treated for 15 minutes with 2 mM EGTA in the absence of extracellular Ca<sup>2+</sup>, while R<sub>max</sub> was obtained following pre-incubation with 1 μM A23187 in the presence of 2 mM CaCl<sub>2</sub>.

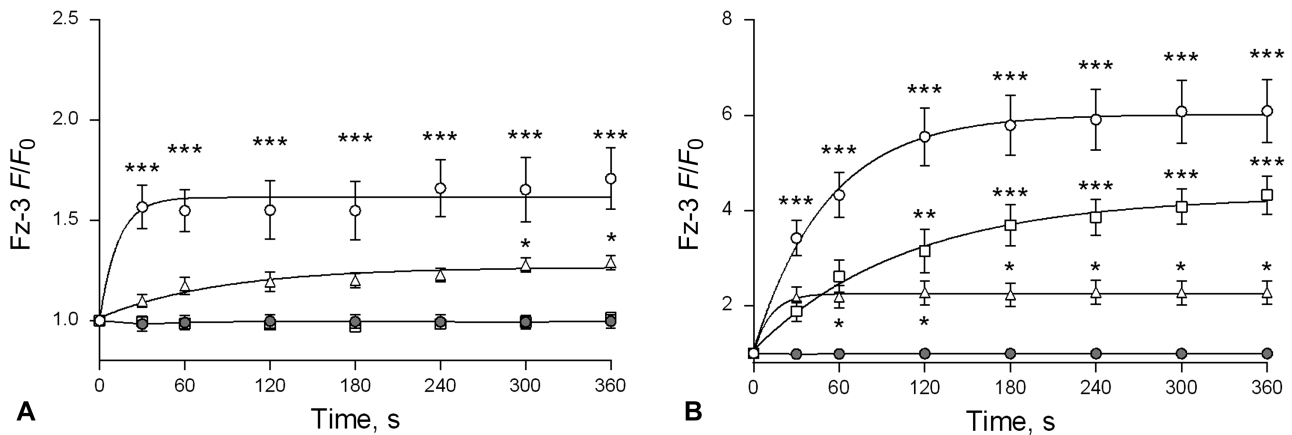

**Supplementary Fig. S2.** Extracellular calcium does not significantly affect agonist- or ionophore-evoked [Zn<sup>2+</sup>]<sub>i</sub> fluctuations. Washed, Fz-3 loaded platelets suspended in Tyrode's buffer supplemented with 2 mM CaCl<sub>2</sub> were stimulated with platelet agonists (A); CRP-XL (1 μg/mL, ○), U46619 (10 μM, ◊), thrombin (1 U/mL) or ionophores (B); clioquinol (◻, 300 μM), pyrithione (△, 300 μM), A23187 (○, 300 μM), during which changes in fluorescence were monitored. ● vehicle control (DMSO). Data are mean ± standard error of the mean (SEM) from at least 4 independent experiments. Significance is denoted as \*\*\**p* < 0.001, \*\**p* < 0.01 or \**p* < 0.05.
